1 **Development of a New Method for the Highly Effective**  
2 **Identification of Cold Resistance in Living Avocado Varieties**

3 Running title : identification of cold resistance in avocado varieties

4 ZHENG Chunlin<sup>1</sup>, WU Fan<sup>1</sup> (First Authors), LI Cuiling, PENG Wenli, ZHANG Shaofeng, ZHU  
5 Jingjie, JIANG Hao, LI Maofu\* (College of Tropical Agriculture and Forestry, Hainan University,  
6 Haikou 570228, Hainan)

7

8 ZHENG Chunlin: E-mail address: [1282165499@qq.com](mailto:1282165499@qq.com)

9 WU Fan: E-mail address: [1597901323@qq.com](mailto:1597901323@qq.com)

10 LI Cuiling: E-mail address: [530017168@qq.com](mailto:530017168@qq.com)

11 PENG Wenli: E-mail address: [1035339309@qq.com](mailto:1035339309@qq.com)

12 ZHANG Shaofeng: E-mail address: [452880843@qq.com](mailto:452880843@qq.com)

13 ZHU Jingjie: E-mail address: [okzjj@163.com](mailto:okzjj@163.com)

14 JIANG Hao: E-mail address: [841479727@qq.com](mailto:841479727@qq.com)

15 LI Maofu\*(Corresponding author). Tel.: +86 13648672826; fax: +86 0898 66260793;E-mail  
16 address: [hafu98022@126.com](mailto:hafu98022@126.com) (M.-F. Li)

17

18 Date of submission: 28<sup>th</sup> November, 2018

19 Number of tables: 8

20 Number of figures: 2

21 Word count: 4208

22

23

24

25

1

2

3

4

5

6

7

8

9

10

11

12

13

14

# 1 **Development of a New Method for the Highly Effective Identification** 2 **of Cold Resistance in Living Avocado Varieties**

3 Runing title : identification of cold resistance in avocado varieties

4 **Highlight:**A new method for identification of avocado cold resistance through  
5 measuring the capacitance of different parts of leaves was developed. This method are  
6 simple, quick and efficient.

7

8 **Abstract:** This paper first identified the cold resistance of 38 varieties of avocado  
9 by determining the semi-lethal low temperature ( $LT_{50}$ ) of the leaves using an  
10 electrical conductivity method in combination with a logistic function, and then  
11 analyzed the correlation between the  $LT_{50}$  of 27 varieties and the capacitance  
12 measured 9 different parts of the leaves in vivo, to explore the relationship between  
13 the cold resistance of various avocado varieties and the capacitance of different parts  
14 of avocado leaves, so as to develop a new method for highly effective identification of  
15 cold resistance of living avocado varieties. The results showed that various avocado  
16 varieties'  $LT_{50}$  was significantly positively correlated with the capacitance of some  
17 parts of leaves, showing that the cold resistance of various avocado varieties was  
18 negatively correlated with the capacitance of various leaf parts. The results of mango  
19 variety trials conducted for comparison is coincident with the theoretical conclusion  
20 reached in the identification of the cold resistance of the avocado. So as to the study  
21 of the cold resistance of avocado and mango varieties, the capacitance of live mature  
22 leaves measured in the field can be used as a new method for the judgment of cold  
23 resistance.

24

25 **Keywords:** *Avocado, capacitance, cold resistance, identification in vivo, relative*

1 *electrical conductivity, semi-lethal temperature.*

2

### 3 **Introduction**

4 The avocado (*Persea americana Mill*) is a fast-growing evergreen arbor fruit tree of  
5 the genus *Persea* in the laurel family. Native to the tropical humid areas in Central  
6 America and Mexico as well as high-altitude mountainous forests or tropical plateaus,  
7 the avocado is a well-known tropical and subtropical fruit tree (*Ge Yu et al., 2017*).  
8 The avocado was introduced into China in 1918, and now is planted in tropical  
9 regions including Hainan, Guangdong, Guangxi, Guizhou, Yunan and Taiwan. Low  
10 temperature is a key limiting factor for fruit farming (*Dong Meichao et al., 2016*), so  
11 the avocado suffers severe chilling damage in winter in subtropical high-elevation  
12 regions such as North Guangxi and Guizhou (*Lv Shihong et al., 1997*). Its leaves  
13 may suffer injury, and in severe cases, the whole plant may die. This seriously affects  
14 the secure development of China's avocado industry. Therefore, it is of great  
15 theoretical and practical significance to identify the cold resistance and tolerable low  
16 temperature range of avocado varieties, in order to guide regional avocado farming,  
17 cold resistant variety breeding and in-depth explorations of the cold resistance  
18 mechanism.

19 The electrical conductivity method is a classical method for the identification of the  
20 cold resistance of plant tissues, and widely used due to its ease and high efficiency  
21 (*Bu Qingyan et al., 2005*). On that basis, the "guide line" of plant tissues at varying  
22 temperature can be determined, and the inflection temperature can be measured using  
23 a logistic function to calculate the  $LT_{50}$  of plant tissues as a quantitative index related  
24 to plant cold resistance (*Zhu Genhai et al., 1986*). In recent years, the electrical  
25 conductivity method has been widely applied to the research and identification of the  
26 cold resistance of fruit trees such as apple (*Yang Fengqiu et al., 2011; Shi Chao et*  
27 *al., 2013*), grape (*Lu Jinxing et al., 2012; Zhang Qian et al., 2013*), pear (*Li Juncai*

1 *et al.*, 2007), syzygium samarangense (*Zhang Lvpeng et al.*, 2012), *Prunus mume*  
2 plum (*Gao Hongzhi et al.*, 2005), *Prunus salicina* plum (*Liu Weisheng et al.*,  
3 1999), orange (*Luo Zhengrong et al.*, 1992) and carambola (*Ren Hui et al.*, 2016),  
4 but there is no report on the combined use of the electrical conductivity method with a  
5 logistic equation to determine the  $LT_{50}$  and cold resistance of the avocado.

6 Due to the accuracy and practicability of the electrical conductivity method or  $LT_{50}$   
7 identification method, its use requires a simulation of low temperature stress and  
8 cutting of plant tissues. To avoid this destructive identification method, it is necessary  
9 to develop a method for identification in vivo to identify the cold resistance of  
10 avocado plants accurately and efficiently.

11 Capacitance is a physical quantity used to represent the charge capacity of a capacitor.  
12 Its value, related to the dielectric constant for the material, the measuring area and the  
13 inter-pole distance (*D. Halliday et al.*, 2002), can be directly measured with a  
14 capacitance meter. Given a measuring area and inter-pole distance, the value of the  
15 capacitance relates only to the dielectric constant of the observed samples. Given  
16 samples, the capacitance measured with a given capacitance meter should be a fixed  
17 value, and this makes it possible to infer sample difference based on the capacitance  
18 measured with the given meter. However, according to our data, there is currently no  
19 study on the inference of plant sample difference by capacitance mensuration.

20 In this paper, therefore, we combined the electrical conductivity method with a  
21 logistic function to measure the  $LT_{50}$  of 38 avocado varieties from Avocado Varieties  
22 Nursery, College of Tropical Agriculture and Forestry, Hainan University. Meanwhile,  
23 we measured the capacitance in different parts of 27 varieties of in vivo avocado  
24 leaves, and made an analysis of the correlation between the  $LT_{50}$  and capacitance of  
25 each part in order to determine whether the electrical conductivity method could be  
26 used to identify the cold resistance of avocado varieties. Then, we measured the  
27 capacitance of the leaves of two big mango varieties: Tainong No. 1 and Dongmang  
28 in the field in order to further validate the reliability of the electrical conductivity

1 method for the identification of plant cold resistance.

## 2 **1 Materials and Methods**

### 3 **1.1 Test Materials**

4 The test materials came from Avocado Varieties Nursery, College of Tropical  
5 Agriculture and Forestry, Hainan University, including 38 avocado varieties, each  
6 from three healthy sexennially bearing trees. Samples were collected in December  
7 2017 and January 2018: 18 healthy, intact mature leaves of basically the same size  
8 were collected from the four cardinal sides (i.e. east, south, west and north) of every  
9 tree. Capacitance for nine of the 18 was measured in vivo, while the remaining nine  
10 were wrapped in wet gauze and taken back to the laboratory for relative electrical  
11 conductivity testing.

### 12 **1.2 Test Methods**

#### 13 1.2.1 Disposal of Low-temperature Stress

14 The 38 portions of avocado leaves were cleaned with running water and then washed  
15 twice with distilled water. After the surface was wiped dry with filter paper, the  
16 leaves were dark-treated for 12 hours at 4°C, 2°C, 0°C, -2°C, -4°C, -6°C and -8°C  
17 respectively, with treatment at room temperature (25°C) as control. In this paper, the  
18 varieties were numerically numbered. See Appendix 1 for detailed information on the  
19 varieties.

#### 20 1.2.2 Relative electrical conductivity measurement

21 After treatment, we took out the material and put it in a preservation box, and put the  
22 preservation box in an ice water mixture of 0°C (an ice water mixture was not used  
23 on the room temperature, 4°C, 2°C or 0°C samples) to unfreeze it for 30min. Then  
24 we cut the leaves into pieces of about 1cm<sup>2</sup>, avoiding larger veins. The samples for

1 each variety of leaves treated at each individual temperature were combined into 304  
2 groups (eight temperature treatments for each of 38 varieties). From each group, we  
3 took six 0.5g samples and put them in ten 100ml Erlenmeyer flasks (the flasks were  
4 cleaned beforehand with dishwashing liquid, washed with distilled water and finally  
5 dried). Then we put 25ml of distilled water in each Erlenmeyer flask and placed it in a  
6 vacuum drying oven to exhaust air for 30min, and placed it on a shaking table to  
7 shake for 1h. The flasks were then removed from the oven and left still for 15min,  
8 after which electrical conductivity K1 was measured with a portable electrical  
9 conductivity meter (Manufacturer: Hangzhou Qiwei Instrument Co., Ltd, model:  
10 DDB-11A), then each flask was weighed. The flasks were then immersed in a boiling  
11 bath and removed for 15min of cooling, after which water was added to restore the  
12 flask weight. The flasks were shaken on the shaking table for one hour, removed and  
13 allowed to remain still for 10min, and finally K2 was measured.

14 Relative electrical conductivity (%)= $K1/K2*100\%$

### 15 1.2.3 Logistic Equation Fitting and Inflection Temperature Calculation

16 By reference to *Zhu Genhai et al.(1986)*'s method, we used the logistic function to  
17 determine the  $LT_{50}$  of plant tissues. In other words, we used SPSS19 to make a  
18 regression analysis of the electrolyte leakage curve of each variety treated at various  
19 low temperatures by fitting the logistic function ( $y=k/(1+a*\exp(-bx))$ ). The calculation  
20 method used for inflection temperature was  $LT_{50}=(\ln a)/b$ .

### 21 1.2.4 Capacitance Mensuration

22 We used a capacitance meter (Chinese brand Mastech, model MS8910) to test the  
23 capacitance in the main vein at the leaf stalk base, the main vein at the middle leaf  
24 section, the main vein at the leaf tip, the lateral vein at the leaf stalk base, the lateral  
25 vein at the middle leaf section, the lateral vein at the leaf tip, the mesophyll in the leaf  
26 stalk base, the mesophyll in the middle leaf section and the mesophyll in the leaf tip

1 (see Fig.1). During testing, we inserted the capacitance meter's metal testing plate  
2 into the site to be measured to assess the capacitance.

### 3 **1.3 Confirmatory trials on mango cold resistance**

4 Dongmang (*Mangifera hiemalis* Liang Jian-Ying) and Tainong No. 1 (*Mangifera*  
5 *indica* cv Tainong), two mango varieties with significantly different cold resistance,  
6 were selected from Mango Varieties Nursery, Genetic Resources Institute, Chinese  
7 Academy of Tropical Agricultural Sciences, for confirmatory trials on the cold  
8 resistance of capacitance (*Wu Zehuan et al., 1984; Huang yun et al., 2013*).  
9 Dongmang showed higher cold resistance than Tainong No. 1. After selecting ten  
10 healthy, intact and mature leaves sprouted in the current year of either variety from  
11 three octennially bearing trees, we measured the capacitance in the main vein at the  
12 leaf stalk base, the main vein at the middle leaf section, the main vein at the leaf tip,  
13 the lateral vein at the leaf stalk base, the lateral vein at the middle leaf section, the  
14 lateral vein at the leaf tip, the mesophyll in the leaf stalk base, the mesophyll in the  
15 middle leaf section and the mesophyll in the leaf tip.

## 16 **2 Results and Analyses**

### 17 **2.1 Analysis of the relative electrical conductivity of different avocado leaves** 18 **under low-temperature stress**

19 As can be seen in Table 1, the relative electrical conductivity of avocado leaves is at  
20 the minimum level at ambient temperature, but there was a significant difference  
21 among the 38 avocado varieties. Variety No. 30 showed electrical conductivity of  
22 only 12.58%, significantly lower than the other varieties, while No. 27 had the highest  
23 electrical conductivity, up to 12.56% higher than that of No. 30. After  
24 low-temperature treatment, the relative electrical conductivity of the avocado varieties  
25 increased to varying degrees, but there was a difference in the amplification of  
26 relative electrical conductivity among the avocado varieties at the same low  
27 temperature. Specifically, after treatment at 4 °C ~-6 °C, the relative electrical



1 conductivity of No. 1 and No. 14 avocado varieties increased by 37.35% and 40.05%  
2 respectively, while the relative electrical conductivity of No. 28 increased by 68.56%  
3 after treatment at 4°C~6°C, and that of No. 43 increased by 68.62% after treatment at  
4 2°C~8°C. This shows a significant difference in relative electrical conductivity  
5 among the 38 avocado varieties at room temperature, and also a big difference in the  
6 range of relative electrical conductivity under the same stress conditions. In other  
7 words, different avocado leaves have different sensitivities to low temperature, but  
8 there is no absolute relation between the electrical conductivity of a leaf and its  
9 sensitivity to low temperature.

## 10 **2.2 Analysis of $LT_{50}$ for different avocado varieties under low-temperature stress**

11 For ease of data analysis, we divided the relative electrical conductivity curves of the  
12 38 avocado varieties into two groups according to the low temperature range and  
13 performed a diagraph analysis (Fig.2a, 2b). As can be seen in Fig.2, the relative  
14 electrical conductivity of the 38 avocado varieties showed a relative rising trend with  
15 the temperature falling, and this conforms to the change characteristics of the “guide  
16 line”. The inflection temperature of 17 varieties appeared between 2°C and -4°C  
17 (Fig.2a), while that of 21 varieties appeared between 0°C and -6°C (Fig.2b).

18 Table 2 shows the results of a regression analysis on the relative electrical  
19 conductivity curve of the 38 avocado varieties conducted by fitting the logistic  
20 function. Number 14 had the highest  $LT_{50}$  at 3.045°C, and No. 21 had the lowest  $LT_{50}$   
21 at -5.056°C, while the others' ranged from -5.056°C to 0.854°C. The value of  $LT_{50}$   
22 can help identify the cold resistance of the various varieties: the lower the  $LT_{50}$  value,  
23 the higher the cold resistance. This shows that of the 38 avocado varieties, No. 21 had  
24 the strongest cold resistance, while No. 14 had the weakest cold resistance.

## 25 **2.3 Correlation between $LT_{50}$ and the electrical conductivity of avocado varieties** 26 **at different temperatures**

1 According to Pearson's correlation analysis of the  $LT_{50}$  of the avocado varieties and  
2 their relative electrical conductivities at different temperatures (Table 3), there is a  
3 highly significant positive correlation between  $LT_{50}$  and the relative electrical  
4 conductivity at 4°C, 2°C, 0°C, -2°C and -4°C, while there is an insignificant  
5 correlation between  $LT_{50}$  and the relative electrical conductivity at -6°C and -8°C  
6 and control temperature. As can be seen in Table 1, at -4°C, the relative electrical  
7 conductivity of 82% of the avocado varieties tested was greater than 50%; at -6°C, the  
8 relative electrical conductivity of all the avocado varieties was greater than 50%.  
9 Therefore, stress treatment at -4°C ~ -6°C can be regarded as the boundary of relative  
10 electrical conductivity at 50%. Under low-temperature stress with relative electrical  
11 conductivity not higher than 50%, the magnitude of relative electrical conductivity  
12 can be used to roughly judge the level of cold resistance: the lower the relative  
13 electrical conductivity, the higher the cold resistance.

#### 14 **2.4 Distribution law of the capacitance of 27 varieties of avocado leaves**

15 As can be seen in Table 4, a large difference in capacitance of the same part was  
16 observed among different varieties of avocado leaves, and there was also a wide  
17 difference among different parts of the same leaf. The capacitance of the main vein at  
18 the leaf stalk base and middle leaf section was observed to be higher than that of the  
19 lateral vein at the leaf stalk base and middle leaf section, while the capacitance of the  
20 lateral vein at the leaf stalk base and middle leaf section was higher than that of the  
21 mesophyll. In about 92% of the 27 avocado varieties, the capacitance of the main vein  
22 at the leaf stalk base was significantly higher than that of the main vein middle leaf  
23 section; in about 96% of avocado varieties, there was no significant difference in  
24 capacitance between the lateral vein at the leaf stalk base and the lateral vein at the  
25 middle leaf section, nor was there a significant difference in the capacitance of the  
26 mesophyll in the leaf stalk base and middle leaf section for any avocado varieties; in  
27 about 63% of avocado varieties, there was no significant difference in capacitance

1 among the main vein at the leaf tip, the lateral vein at the leaf tip and the mesophyll  
2 in the leaf tip. The capacitance of the main vein at the leaf stalk base, middle leaf  
3 section and leaf tip showed a significant decreasing trend, while there is no significant  
4 difference in capacitance between the lateral vein at the leaf stalk base and the lateral  
5 vein at the middle leaf section, but capacitance was significantly higher than the  
6 lateral vein at the leaf tip. In 58% of avocado varieties, there was no significant  
7 difference observed in the capacitance of mesophyll among the leaf stalk base, middle  
8 leaf section and leaf tip. This shows that there is a big difference in capacitance  
9 among different parts of avocado leaves, so when comparing the capacitance of  
10 different varieties, we should select the same part.

## 11 **2.5 Analysis of the correlation between the capacitance of different parts of** 12 **avocado leaves and the $LT_{50}$**

13 Table 5 shows the results of a Pearson's correlation analysis of the  $LT_{50}$  of 27  
14 avocado varieties and the capacitance of the corresponding leaves. The  $LT_{50}$  of the  
15 various avocado varieties was significantly positively correlated with the capacitance  
16 of the main vein at the middle leaf section, the main vein at the leaf tip and the lateral  
17 vein at the leaf stalk base. Its correlation with the capacitance of the lateral vein at the  
18 leaf stalk base was at a very significant level. Although the correlation between the  
19 capacitance of other leaf parts and the  $LT_{50}$  was not significant at the level of 0.05, the  
20 correlation between the capacitance of the main vein at the leaf stalk base, lateral vein  
21 at the middle leaf section, mesophyll in the leaf stalk base and mesophyll in the  
22 middle leaf section and the  $LT_{50}$  was greater than 92%; the capacitance of the lateral  
23 vein at the leaf tip and the mesophyll in the leaf tip and the  $LT_{50}$  was around 80%.  
24 Thus we can conclude that the cold resistance of avocado varieties is significantly  
25 negatively correlated with the capacitance of the main vein at the middle leaf section,  
26 the main vein at the leaf tip and lateral vein at the middle leaf section of various  
27 varieties, and also negatively correlated with the capacitance of other parts of leaves.  
28 In other words, the higher the cold resistance, the lower the capacitance of leaf  
29 tissues.

## 1 **2.6 Analysis of the capacitance of mango leaves with different levels of cold** 2 **resistance**

3 Table 6 shows the capacitance of the various parts of Dongmang and Tainong No. 1 leaves. The  
4 capacitance of nine parts of Dongmang leaves is lower than that of Tainong No. 1. According to  
5 the variance analysis in Table 7, the capacitance of the main vein in the middle leaf section of a  
6 Dongmang leaf is 0.189nF, significantly lower than that of Tainong No. 1, which is 0.3764nF; the  
7 capacitance of the main vein in a Dongmang leaf at stalk base and leaf tip is significantly lower  
8 than that of Tainong No. 1, while the cold resistance of Dongmang is higher than that of Tainong  
9 No. 1. This shows that the capacitance of some parts of mango leaves is negatively correlated with  
10 their cold resistance, and the value of capacitance can be used to identify the cold resistance of  
11 mango leaves. This is consistent with the results of capacitance research regarding the  
12 identification of avocado cold resistance.

## 13 **3 Conclusions and Discussion**

14 Temperature is an important ecological factor influencing the growth and  
15 development of plants (*Wei Jianxue, 2007*). Low temperature is one factor limiting  
16 the survival rate and distribution of plants, and when the temperature is lower than  
17 what is required for plant growth, plants will suffer with growth slowing or stopping  
18 (*Zhao Xijuan, 2013*), and some plants even dying (*Li Wenming, 2017*). Accurate,  
19 reliable identification and testing of plant cold resistance is essential for studies of the  
20 mechanism of chilling injury and cold resistance in plants, as well as breeding and  
21 innovation of excellent cold-resistant varieties (*Xu Chenxiang, 2012*). However, the  
22 methods used to research, evaluate and identify plant cold resistance are still limited  
23 by the species, organs, histologic types and physiological conditions of plants as well  
24 as research objectives and instruments (*Xu Chenxiang, 2014*).

25 Global scientific researchers have developed a few methods to research plant cold  
26 resistance, such as field production identification (*Sandra E. Vega et al., 1996; Zhang*  
27 *Qingfei et al., 2007; Zhao Xuemei et al., 2011*), freezing injury surveys (*Bao Wenjuan et*

1 *al., 2005; Zhou Xihua et al., 2008*), manual frozen weather simulations (*Wei Jianxue,*  
2 *2007; Liu Pin et al., 2009*), and mathematical modeling (*Timm is R et al., 1994;*  
3 *Zhang G et al., 2003*). However, existing plant cold resistance testing methods  
4 require manual freezing treatment, and most methods won't produce results until after  
5 treatment at freezing temperature. So far no method is considered to be reliable and  
6 effective in testing plant cold resistance.

7 Previous research has shown that the permeability of a plant cell membrane changes  
8 under low-temperature stress (*Huang Yun et al., 2014*), and relative electrical  
9 conductivity—which can reflect the permeability of the plant cell membrane—can be  
10 measured to determine the level of injury from low temperatures, thereby providing a  
11 means to test plant cold resistance (*Zhu Genhai et al., 1986*). On that basis,  
12 Rajashekar et al. used the logistic function curve to describe how low temperatures  
13 injured plant cell membranes, and proposed  $LT_{50}$  as the curve inflection, using it to  
14 decide plant cold resistance (*Rajashekar C et al., 1979*). The results of the present  
15 study show that the relative electrical conductivity of the 38 varieties of avocado  
16 leaves examined increases with lower stress temperatures, that there is a significant  
17 difference in relative electrical conductivity among different varieties at the same  
18 stress temperature (Table 1), and that there is also a big difference in  $LT_{50}$  among the  
19 different varieties (Table 2). This illustrates that relative electrical conductivity and  
20  $LT_{50}$  can be used to effectively distinguish among the avocado varieties in terms of  
21 cold resistance. In addition, this study has also found that if the relative electrical  
22 conductivity is not greater than 50% under low-temperature stress, there is a  
23 significantly positive correlation between relative electrical conductivity and  $LT_{50}$ ,  
24 and if the relative electrical conductivity is greater than 50% under low-temperature  
25 stress, there is an insignificant correlation between relative electrical conductivity and  
26  $LT_{50}$ . Moreover, there is no absolute relationship between the electrical conductivity  
27 of a leaf at normal temperature and its sensitivity under low temperature (Table 1), so  
28 relative electrical conductivity at normal temperature is unsuitable for the

1 identification of plant cold resistance.

2 In this study, at normal temperature, a large difference was observed in the  
3 capacitance of the same part among different varieties of avocado leaves, and there  
4 was also a big difference in the capacitance of different parts of the same leaf (Table  
5 4). The capacitance in the main vein at the middle leaf section, the main vein at the  
6 leaf tip and the lateral vein at the leaf stalk base was significantly positively correlated  
7 with  $LT_{50}$ . The capacitance in the lateral vein at the leaf stalk base was found to have  
8 a particularly strong positive correlation with  $LT_{50}$  (Table 5). Thus we may conclude  
9 that the cold resistance of the avocado is significantly negatively correlated with the  
10 main vein at the middle leaf section, the main vein at the leaf tip and the lateral vein at  
11 the middle leaf section. In other words, the higher the cold resistance, the lower the  
12 capacitance of the various parts of leaves. This conclusion has been further verified in  
13 trials on two mango varieties with greatly different levels of cold resistance: the  
14 capacitance of the various parts of Dongmang leaves, which have high cold resistance,  
15 is lower than that of Tainong No. 1. In particular, the capacitance of the main vein at  
16 the leaf stalk base, middle leaf section, and leaf tip of Dongmang is significantly  
17 lower than in the corresponding regions of Tainong No. 1 (Tables 6 & 7). This might  
18 be because capacitance is a physical parameter that measures and represents the  
19 capacity of a capacitor (*D. Halliday et al., 2002*), and its magnitude relates to the state,  
20 structure and chemical composition of dielectrics. The tissue water in leaves is free  
21 water and a medium that contains charges. Within the range of unit volume, the  
22 higher the content of free water, the stronger the charge capacity, and the higher the  
23 capacitance (*Zhang Baishan, 2005; Wang Da, 2013*). However, the higher the  
24 content of free water, the lower cold resistance of leaf tissues (*Li Huimin and Lu Yan,*  
25 *2013*).

26 Therefore, we argue that using a capacitance meter in the field it is practicable to  
27 identify a relationship in cold resistance among different varieties by determining the  
28 suitable parts of mature plant leaves. Moreover, this identification method does not

1 demand plant samples undergo low-temperature stress, because it works at normal  
2 temperature, giving it more convenience, efficiency and non-destructiveness.  
3 However, this method can only be used to identify the relative cold resistance among  
4 different varieties, not to accurately determine the specific range of low temperatures  
5 to which a plant is resistant.

## 6 **Acknowledgments**

7 The present study was carried out by our team under the guidance of Professor Li  
8 Shaopeng from the College of Tropical Agriculture and Forestry, Hainan University.  
9 We would like to thank all the team members for their hard work. The present study  
10 was accomplished with funding from the Hainan Provincial Ministry of Agriculture  
11 Bureau of Agricultural Reclamation as an experimental agricultural technology  
12 demonstration and service support project on avocado seedling breeding technology  
13 (151721301064071703-3) and avocado resource protection  
14 (151721301354051707-2).





## References

- Bao Wenjuan, Qiu Jinqing, Xie Guoyang, Jing Luanyong, Zhang Wenjuan.** 2005. Investigation on freezing injury of Eucalyptus in Fujian. *Journal of Fujian Forestry Science and Technology* 33(1), 87-93.
- Bu Qingyan, Zhou Yanqi, Xu Yingwu, Yang Feng.** 2005. Research progress on cold resistance of apple. *Northern Fruits* 02, 1-4.
- D. Halliday , R. Resnick , K. S. Krane.** 2002. PHYSICS(Fifth Edition). *JOHN WILEY & SONS, INC.*
- Dong Meichao, Yue Jianqiang, Ling Peng, Liu Pengfei, Li Jinxue, Gao Junyan.** 2016. Research progress on cultivation of avocado. *Chinese Agricultural Science Bulletin* 32(16), 61-65.
- Gao Hongzhi, Zhang Zhen, Han Zhenhai.** 2005. Identification of cold resistance of fruit germplasm. *Journal of Fruit Science* 06, 113-115.
- Ge Yu, Si Xiongyuan, Lin Xinge, Wang Jiashui, Cang Xiaoping, Ma Weihong.** 2017. Research progress of avocado. *South China Fruits* 46(01), 148-155.
- Huang Yun, Du Bin, Du Bang, Li Guizhen, Li Guili, Luo Zhaoxi, Li Suoqing, Wu Jianhua.** 2014. Investigation report on freezing injury of mango in Panzhihua in 2013. *China Tropical Agriculture* 02, 51-54.
- Li Huimin, Lu Yan.** 2013. Effect of water content on cold resistance of tea leaves. *Journal of Tea* 39(02), 72-74.
- Li Juncai, Liu Cheng, Wang Jiazhen, Cai Zhongming, Sha Shoufeng.** 2007. Semi lethal temperature of low temperature of pear branches. *Journal of Fruit Science* 04, 529-5.
- Liu Pin, Zhang Leijie, Zhang Gang, Sun Yuzhu.** 2009. Evaluation of cold resistance of several new jujube cultivars (lines). *Hebei Journal of Forestry and Orchard Research* 24(4), 423-426.
- Liu Weisheng, Zhang Jiayan, Tang Shiyong, Gao Xiuyun.** 1999. Identification of cold resistance of germplasm resources of Prunus. *NORTHERN FRUITS* 02, 6-8.
- Li Wenming, Xin Jianpan, Wei Chiyu, Tian Runan.** 2017. Research progress on cold resistance of plants. *Jiangsu Agricultural Sciences* 12, 6-11.
- Lu Jinxing, Jiang Hanyu, Li Wei.** 2012. Effects of low temperature stress on cold resistance of

rootstocks and wine grape branches. *Journal of Fruit Science* **29(06)**, 1040-1046.

**Luo Zhengrong, Shu Xiaodong, Li Chuncu, Chen Yongzhong.** 1992. Technical specification for identification of Citrus freezing resistance. *Journal of Fruit Science* **04**, 203-207.

**Lv Shihong, Li Chun, Jiang Xinneng.** 1997. Observation on cold resistance of avocado in North Guangxi. *GUIHAIA* **3**, 259-262.

**Rajashekar C , Gusta L V , Burke M J .** 1979. Membrane structural transitions:probable relation to frost damage in hardy herbaceous species / /Lysons J M , Graham D , Raison J K . Low temperature stress in crop plants the role of membrane . New York: *Academic Press* , 255 - 274 .

**Ren Hui, Wang Xiaomei, Liu Yeqiang, Su Weiqiang.** 2016. Determination of cold resistance of Carambola branches by electrical conductivity method and Logistic equation. *Southwest China Journal of Agricultural Sciences* **3**, 662-667.

**Sandra E. Vega, John B. Bamberg, Jiwan P. Palta.** 1996. Potential for improving freezing stress tolerance of wild potato germplasm by supplemental calcium fertilization. *American Potato Journal* **73**, 9.

**Shi Chao, Wang Yazhi, Liu Guojie.** 2013. Determination of semi lethal temperature of five apple branches by Logistic equation. *Northern Horticulture* **02**, 36-38.

**Timm is R, Flewe ling J, Talbert C.** 1994. Frost injury prediction model for douglasfir seedlings in the Pacific Northwest. *Tree Physiology* **14**, 855-869.

**Wang Da.** 2013. Research on measuring system of water content of crude oil based on capacitance method. PhD thesis, *Taiyuan University of Science and Technology*.

**Wei Jianxue.** 2007. Effects of exogenous betaine on physiological responses of banana seedlings to cold stress. PhD thesis, *Tropical Agriculture University Of South China*.

**Wu Zehuan, Gan Baolin, Shi Xiaojian.** 1984. Investigation report on freezing injury of mango trees in southern Guangxi. *China Tropical Agriculture* **03**, 50-54.

**Xu Chenxiang.** 2012. Research progress on mechanism of improving plant cold resistance. *Acta Ecologica Sinica* **32(24)**, 7966-7980.

**Xu Chenxiang.** 2014. Research progress on identification and testing methods of cold hardiness

in plants. *Guangdong Agricultural Sciences* **41(16)**, 50-54.

**Yang Fengqiu, Chen Dongmei, Zhao Yongbo, Zhang Xinsheng, Xu Jingtao.** 2011. Comparative study on cold resistance of Apple Dwarf Rootstocks. *Journal of Hebei Agricultural Sciences* **15(04)**, 8-9.

**Zhang Baishan.** 2005. Dielectric permittivity and its application. *Journal of Neijiang Teachers College* **02**, 28-30.

**Zhang G, Ryypp A, Vapaavuor I E, et al.** 2003. Quantification of additive response and stationarity of frost hardiness by photoperiod and temperature in Scots pine. *Canadian Journal of Forest Research* **33**, 1772-1784.

**Zhang Lypin, Cai Yongqiang, Jin Jilin, Chen Shouyi, Zhongjie.** 2012. Semi lethal temperature of low temperature and cold tolerance adaptability of different species of wax apple. *Journal of Fruit Science* **29(02)**, 291-295.

**Zhang Qian, Liu Chonghuai, Guo Dalong, Jing Fujian, Fan Xiucui, Zhang Yin.** 2013. Relationship between Semi lethal temperature of low temperature and cold resistance adaptability of 5 grape populations. *Journal of Northwest A & F University(Natural Science Edition)* **41(05)**, 149-154.

**Zhang Qingfei, Wu Haipin, Xu Dongxin.** 2007. Analysis on freezing injury of 7 species of palm plants introduced in Shanghai. *Journal of Zhejiang Forestry College* **24(1)**, 110-114.

**Zhao Xijuan.** 2013. Establishment of direct identification method for cold resistance of potato and screening of cold resistant resources. PhD thesis, *Huazhong Agricultural University*.

**Zhao Xuemei, Cheng Fangyun, Tang Lihong, Zhu Yue, Yuan Junhui, Ju Zhxin.** 2011. Introduction and cold resistance of *Paeonia suffruticosa* in Chifeng area. *Journal of Beijing Forestry University* **33(2)**, 84-90.

**Zhou Xihua, Xu Yongjie, Luo Zhijian, Zhou Guizhen, Deng Xianzhen, Cheng Junyong, Chen Chunfang, Fu Yun, Luo Yougang, Gao Benwang.** 2008. Investigation on freezing injury of Citrus in the Three Gorges Reservoir area of Hubei. *Scientia Silvae Sinicae* **44(11)**, 145-151.

**Zhu Genhai, Liu Zuqi, Zhu Peiren.** 1986. Application of Logistic equation to determine the semi lethal temperature of plant tissues at low temperature. *Journal of Nanjing Agricultural University* **03**, 11-16.



**Table 1 Relative electrical conductivity of 38 avocado varieties leaves under different temperatures stress.**

|       |                | Relative electric conductivity(%) |                 |                |                   |                   |                    |      |
|-------|----------------|-----------------------------------|-----------------|----------------|-------------------|-------------------|--------------------|------|
|       |                | 4°C                               | 2°C             | 0°C            | -2°C              | -4°C              | -6°C               | -8°C |
|       | CK             |                                   |                 |                |                   |                   |                    |      |
| NO.1  | 15.48±0.8defg  | 32.41±1.3a                        | 35.00±1.5b      | 38.92±0.5bc    | 53.94±1.9cde      | 64.74±1.0fghijk   | 69.76±0.8efghijk   |      |
| NO.7  | 23.69±0.5ab    | 30.53±1.1a                        | 32.20±0.8bc     | 35.75±3.0bcd   | 43.54±1.6defghij  | 73.39±0.9abcdef   | 76.57±0.8bcdefghij |      |
| NO.8  | 13.54±0.3fg    | 22.26±0.4b                        | 25.89±0.6cd     | 32.08±1.1cde   | 69.00±1.0a        | 72.22±1.1abcdefg  | 76.26±1.5bcdefghij |      |
| NO.11 | 15.07±0.3defg  | 22.16±0.4b                        | 22.78±0.6defgh  | 32.27±0.7bcde  | 54.58±2.5bcd      | 68.77±1.4bcdefghi | 69.06±0.6fghijk    |      |
| NO.13 | 21.84±0.5abc   | 22.57±0.8b                        | 23.50±0.8defg   | 40.77±1.2b     | 61.46±1.2abc      | 66.36±0.5defghijk | 66.99±0.6jk        |      |
| NO.14 | 20.09±0.5abcde | 31.17±0.7a                        | 44.21±0.8a      | 55.87±0.9a     | 67.80±0.8ab       | 70.74±1.2abcdefgh | 71.22±0.8defghijk  |      |
| NO.15 | 13.67±0.3fg    | 16.16±0.4c                        | 19.12±0.5efghi  | 21.93±0.9fghi  | 41.98±1.7defghijk | 66.15±1.1efghijk  | 67.48±1.1ijk       |      |
| NO.16 | 20.27±0.7abcde | 20.48±0.4bc                       | 20.88±0.2defghi | 23.25±0.3fghi  | 46.90±1.4defgh    | 65.95±0.6efghijk  | 67.23±1.0jk        |      |
| NO.18 | 15.84±0.2cdefg | 16.88±0.3bc                       | 17.79±0.5fghi   | 20.70±0.3fghi  | 37.67±0.9ghijklm  | 63.51±0.8fghijk   | 66.09±1.3jk        |      |
| NO.23 | 16.12±0.2cdefg | 20.15±0.4bc                       | 20.22±0.1defghi | 21.82±0.3fghi  | 37.91±1.3fghijklm | 82.58±0.6a        | 83.58±0.6ab        |      |
| NO.25 | 17.23±0.2cdefg | 20.31±0.4bc                       | 20.42±0.2defghi | 24.58±0.4efghi | 49.39±1.6cdefg    | 72.14±1.2abcdefg  | 81.25±0.6abcd      |      |

|       |                 |             |                 |                |                    |                    |                    |                 |
|-------|-----------------|-------------|-----------------|----------------|--------------------|--------------------|--------------------|-----------------|
| NO.28 | 17.34±0.6cdefg  | 19.62±0.4bc | 19.90±0.4defghi | 24.46±1.0efghi | 51.24±1.9cde       | 80.67±0.4ab        | 88.18±0.6a         |                 |
| NO.29 | 16.45±0.5cdefg  | 20.63±0.4bc | 20.84±0.2defghi | 26.07±0.7efgh  | 41.43±1.1defghijkl | 78.21±0.8abcde     | 83.36±0.7ab        |                 |
| NO.32 | 16.67±0.3cdefg  | 17.84±0.6bc | 17.89±0.0fghi   | 22.74±0.3fghi  | 41.85±1.3defghijk  | 79.24±1.6abcd      | 82.89±1.1abc       |                 |
| NO.33 | 18.05±0.4bcdefg | 18.55±0.4bc | 18.74±0.6fghi   | 26.57±0.9efg   | 42.09±0.7defghij   | 68.71±0.7bcdefghi  | 68.89±0.6ghijk     |                 |
| NO.34 | 18.17±0.5bcdefg | 18.38±0.0bc | 18.47±0.5fghi   | 19.89±0.3fghi  | 23.03±0.2nopq      | 62.65±1.3fghijk    | 78.44±1.2abcdefgh  |                 |
| NO.38 | 17.87±0.7bcdefg | 18.00±0.5bc | 18.17±0.1fghi   | 20.49±0.4fghi  | 41.25±1.8efghijkl  | 78.11±1.6abcde     | 81.26±1.3abcd      |                 |
| NO.6  | 18.05±0.6bcdefg |             | 18.24±0.2fghi   | 18.86±1.0fghi  | 34.89±1.2hijklmn   | 68.58±1.1bcdefghi  | 69.52±1.3fghijk    | 69.63±0.9defg   |
| NO.9  | 20.82±0.3abcd   |             | 21.17±0.6defghi | 24.38±0.8efghi | 42.25±1.0defghij   | 67.88±0.9bcdefghij | 70.46±0.5efghijk   | 70.96±0.2cdefg  |
| NO.10 | 15.03±2.0defg   |             | 19.90±0.7defghi | 20.82±1.5fghi  | 47.37±0.4defgh     | 48.09±2.0lmno      | 68.19±0.9ghijk     | 69.12±0.3efg    |
| NO.12 | 14.14±0.2efg    |             | 19.93±0.4defghi | 27.18±0.4def   | 27.44±1.9mnopq     | 34.86±1.3op        | 69.76±0.5efghjik   | 72.72±0.9bcdefg |
| NO.17 | 16.47±0.4cdefg  |             | 19.76±0.3defghi | 22.62±0.4fghi  | 22.78±0.2nopq      | 58.22±1.2hijkl     | 62.22±0.7k         | 65.19±0.8g      |
| NO.19 | 14.95±0.2defg   |             | 20.38±0.2defghi | 20.96±0.8fghi  | 30.60±1.4jklmnopq  | 33.71±0.8p         | 67.87±1.2hijk      | 68.20±0.8fg     |
| NO.21 | 18.38±0.4bcdefg |             | 24.04±0.4def    | 26.24±0.5efg   | 26.96±0.4mnopq     | 34.20±0.5p         | 62.52±0.9k         | 68.46±1.2fg     |
| NO.22 | 16.00±0.2cdefg  |             | 19.77±0.7defghi | 20.25±0.4fghi  | 44.38±2.4defghi    | 66.92±0.9defghij   | 76.11±0.6bcdefghij | 76.35±0.2abcdef |
| NO.24 | 15.17±0.3defg   |             | 19.80±0.6defghi | 21.01±0.3fghi  | 22.77±0.3nopq      | 67.53±1.2cdefghij  | 68.07±0.0ghijk     | 68.47±0.8fg     |

|       |                 |                 |               |                   |                    |                    |                 |
|-------|-----------------|-----------------|---------------|-------------------|--------------------|--------------------|-----------------|
| NO.26 | 16.51±0.3cdefg  | 17.69±0.3fghi   | 19.08±0.3fghi | 27.17±0.9mnopq    | 62.27±1.9fghijk    | 68.41±1.8ghijk     | 69.07±0.7efg    |
| NO.27 | 25.14±0.5a      | 25.32±0.5de     | 26.60±0.5efg  | 49.83±0.6cdefg    | 53.71±1.2klmn      | 73.38±0.5bcdefghij | 73.69±1.3bcdefg |
| NO.30 | 12.58±0.2g      | 19.99±0.3defghi | 22.20±0.7fghi | 51.10±0.7cdef     | 57.68±1.2ijkl      | 73.20±0.4bcdefghij | 73.57±0.3bcdefg |
| NO.31 | 14.74±0.2defg   | 17.27±0.3ghi    | 17.39±0.2i    | 18.98±0.3q        | 65.35±1.3efghijk   | 78.59±0.3abcdefg   | 80.90±1.3ab     |
| NO.35 | 18.93±0.5bcdef  | 21.41±0.2defghi | 22.14±0.2fghi | 23.43±0.4nopq     | 59.61±1.2ghijkl    | 76.60±0.8bcdefghij | 76.64±0.7abcdef |
| NO.37 | 15.66±0.5defg   | 17.55±0.1ghi    | 18.30±0.3ghi  | 34.09±1.1hijklmno | 55.34±1.1jklm      | 72.39±1.0cdefghijk | 75.50±1.8bcdef  |
| NO.39 | 15.87±0.4cdefg  | 20.29±0.4defghi | 20.77±0.6fghi | 28.70±1.0klmnopq  | 44.45±1.1mnop      | 74.72±1.3bcdefghij | 77.79±0.9abcd   |
| NO.40 | 17.54±0.5bcdefg | 20.48±0.1defghi | 20.68±0.3fghi | 28.25±0.6lmnopq   | 80.24±0.9abc       | 80.41±0.6abcde     | 80.90±0.6ab     |
| NO.41 | 18.93±0.5bcdef  | 19.05±0.4efghi  | 19.28±0.4fghi | 21.40±0.4opq      | 67.64±1.7cdefghij  | 68.86±1.4ghijk     | 77.32±0.9abcde  |
| NO.42 | 15.67±0.2defg   | 17.17±0.5ghi    | 19.03±0.4fghi | 33.22±1.7ijklmnop | 69.78±0.9abcdefghi | 78.18±1.2abcdefghi | 79.02±0.6abc    |
| NO.43 | 15.31±0.3defg   | 16.13±0.3i      | 16.60±0.2i    | 20.41±0.7pq       | 41.69±2.0nop       | 79.64±1.1abcdef    | 84.75±1.2a      |
| NO.44 | 16.79±0.0cdefg  | 17.00±0.3hi     | 17.60±0.1hi   | 17.84±0.2q        | 49.23±2.7lmn       | 74.31±1.2bcdefghij | 74.87±0.6bcdef  |

Each value is given as the mean ± standard error(n=6). Within columns, means followed by the same letter are not significantly different at P < 0.05(Games-Howell test).





**Table 2: Logistic equation and semi-lethal low temperature of 38 varieties of avocado.**

|        | Equation                         | R <sup>2</sup> | LT <sub>50</sub> (°C) |
|--------|----------------------------------|----------------|-----------------------|
| No. 1  | $y=100/(1+1.247\exp(0.177x))$    | 0.955          | -1.247                |
| No. 6  | $y=75.644/(1+2.408\exp(0.545x))$ | 0.927          | -1.612                |
| No. 7  | $y=100/(1+1.375\exp(0.229x))$    | 0.868          | -1.391                |
| No. 8  | $y=88.019/(1+1.045\exp(0.376x))$ | 0.913          | -0.117                |
| No. 9  | $y=77.302/(1+1.671\exp(0.458x))$ | 0.951          | -1.121                |
| No. 10 | $y=78.991/(1+1.884\exp(0.347x))$ | 0.936          | -1.825                |
| No. 11 | $y=86.893/(1+1.269\exp(0.312x))$ | 0.946          | -0.764                |
| No. 12 | $y=100/(1+3.514\exp(0.276x))$    | 0.881          | -4.553                |
| No. 13 | $y=74.496/(1+0.713\exp(0.396x))$ | 0.950          | 0.854                 |
| No. 14 | $y=74.665/(1+0.304\exp(0.391x))$ | 0.993          | 3.045                 |
| No. 15 | $y=94.526/(1+2.238\exp(0.32x))$  | 0.941          | -2.517                |
| No. 16 | $y=98.157/(1+2.031\exp(0.278x))$ | 0.921          | -2.549                |
| No. 17 | $y=78.868/(1+2.474\exp(0.348x))$ | 0.877          | -2.603                |

|        |                                   |       |        |
|--------|-----------------------------------|-------|--------|
| No. 18 | $y=100/(1+2.654\exp(0.298x))$     | 0.933 | -3.275 |
| No. 19 | $y=100/(1+3.646\exp(0.266x))$     | 0.891 | -4.863 |
| No. 21 | $y=100/(1+3.215\exp(0.231x))$     | 0.872 | -5.056 |
| No. 22 | $y=82.64/(1+2.155\exp(0.491x))$   | 0.966 | -1.564 |
| No. 23 | $y=138.358/(1+3.631\exp(0.313x))$ | 0.894 | -4.120 |
| No. 24 | $y=77.887/(1+2.72\exp(0.465x))$   | 0.847 | -2.152 |
| No. 25 | $y=130.189/(1+2.948\exp(0.28x))$  | 0.955 | -3.861 |
| No. 26 | $y=77.592/(1+2.841\exp(0.471x))$  | 0.922 | -2.217 |
| No. 27 | $y=88.095/(1+1.698\exp(0.296x))$  | 0.948 | -1.789 |
| No. 28 | $y=125.323/(1+2.764\exp(0.337x))$ | 0.953 | -3.017 |
| No. 29 | $y=99.783/(1+2.017\exp(0.353x))$  | 0.926 | -1.988 |
| No. 30 | $y=79.152/(1+1.719\exp(0.435x))$  | 0.959 | -1.245 |
| No. 31 | $y=89.855/(1+5\exp(0.545x))$      | 0.913 | -2.953 |
| No. 32 | $y=119.922/(1+3.083\exp(0.352x))$ | 0.935 | -3.199 |
| No. 33 | $y=99.438/(1+2.173\exp(0.297x))$  | 0.939 | -2.613 |

|        |                                  |       |        |
|--------|----------------------------------|-------|--------|
| No. 34 | $y=100/(1+3.609\exp(0.391x))$    | 0.860 | -3.282 |
| No. 35 | $y=100/(1+2.794\exp(0.299x))$    | 0.869 | -3.436 |
| No. 37 | $y=88.196/(1+3.059\exp(0.396x))$ | 0.976 | -2.823 |
| No. 38 | $y=117.95/(1+3.13\exp(0.354x))$  | 0.926 | -3.223 |
| No. 39 | $y=100/(1+3.804\exp(0.334x))$    | 0.940 | -4.000 |
| No. 40 | $y=96.207/(1+2.585\exp(0.404x))$ | 0.852 | -2.351 |
| No. 41 | $y=86.414/(1+3.561\exp(0.46x))$  | 0.882 | -2.761 |
| No. 42 | $y=97.965/(1+2.663\exp(0.358x))$ | 0.921 | -2.736 |
| No. 43 | $y=105.714/(1+5\exp(0.376x))$    | 0.930 | -4.280 |
| No. 44 | $y=92.549/(1+5\exp(0.423x))$     | 0.921 | -3.805 |





**Table 3: Pearson correlation analysis between  $LT_{50}$  and relative electrical conductivity of 38 varieties of avocado leaves at different temperatures.**

|                         | Temperature |         |         |         |         |         |        |        |
|-------------------------|-------------|---------|---------|---------|---------|---------|--------|--------|
|                         | CK          | 4°C     | 2°C     | 0°C     | -2°C    | -4°C    | -6°C   | -8°C   |
| Correlation coefficient | 0.269       | 0.420** | 0.649** | 0.727** | 0.708** | 0.415** | -0.151 | -0.124 |
| Sig                     | 0.102       | 0.009   | 0.000   | 0.000   | 0.000   | 0.010   | 0.365  | 0.593  |

\* Significant correlation at the 0.05 level (bilateral)

\*\* Significant correlation at the 0.01 level (bilateral)



**Table 4: Capacitance of 26 varieties of avocado leaves at ambient temperature.**

|        | Capacitance (nF)                     |                                   |                               |                                         |                                             |                              |                                      |                                          |                               |
|--------|--------------------------------------|-----------------------------------|-------------------------------|-----------------------------------------|---------------------------------------------|------------------------------|--------------------------------------|------------------------------------------|-------------------------------|
|        | The main vein at the leaf stalk base | The main vein middle leaf station | The main vein at the leaf tip | The lateral vein at the leaf stalk base | The lateral vein at the middle leaf section | The lateral vein at leaf tip | The mesophyll in the leaf stalk base | The mesophyll in the middle leaf section | The mesophyll in the leaf tip |
| No. 1  | 0.3064±0.0413a                       | 0.0373±0.0045b                    | 0.0094±0.0007de               | 0.0176±0.0014bc                         | 0.0169±0.0008c                              | 0.0110±0.0007d               | 0.0106±0.0006d                       | 0.0106±0.0008de                          | 0.0076±0.0004e                |
| No. 6  | 0.4414±0.0870a                       | 0.0523±0.0071b                    | 0.0077±0.0007cd               | 0.0159±0.0015c                          | 0.0190±0.0027c                              | 0.0083±0.0008cd              | 0.0063±0.0006d                       | 0.0070±0.0005d                           | 0.0053±0.0006d                |
| No. 7  | 0.3400±0.0338a                       | 0.0537±0.0073b                    | 0.0081±0.0006f                | 0.0144±0.0007d                          | 0.0204±0.0010c                              | 0.0109±0.0003e               | 0.0091±0.0004ef                      | 0.0101±0.0005ef                          | 0.0070±0.0004f                |
| No. 9  | 0.3429±0.0644a                       | 0.0323±0.0045b                    | 0.0071±0.0004e                | 0.0147±0.0010bc                         | 0.0163±0.0008b                              | 0.0093±0.0004cd              | 0.0109±0.0004cd                      | 0.0084±0.0005de                          | 0.0060±0.0000e                |
| No. 10 | 0.3047±0.0591a                       | 0.0477±0.0047a                    | 0.0070±0.0007c                | 0.0147±0.0015b                          | 0.0143±0.0011b                              | 0.0084±0.0008bc              | 0.0070±0.0003c                       | 0.0074±0.0005c                           | 0.0050±0.0004c                |
| No. 11 | 0.1993±0.0284a                       | 0.0343±0.0052b                    | 0.0051±0.0005de               | 0.0099±0.0011cd                         | 0.0114±0.0013bc                             | 0.0046±0.0004ef              | 0.0051±0.0005de                      | 0.0053±0.0004de                          | 0.0027±0.0004f                |
| No. 12 | 0.3753±0.0966a                       | 0.0889±0.0276b                    | 0.0067±0.0006d                | 0.0150±0.0027c                          | 0.0187±0.0032c                              | 0.0079±0.0008d               | 0.0063±0.0007d                       | 0.0057±0.0007de                          | 0.0039±0.0006e                |
| No. 13 | 0.3234±0.0484a                       | 0.0481±0.0049b                    | 0.0089±0.0007de               | 0.0177±0.0014c                          | 0.0199±0.0015c                              | 0.0081±0.0001de              | 0.0087±0.0004d                       | 0.0094±0.0004d                           | 0.0061±0.0005e                |
| No. 14 | 0.9847±0.1716a                       | 0.1657±0.0500b                    | 0.0096±0.0007d                | 0.0223±0.0029c                          | 0.0253±0.0037c                              | 0.0103±0.0008d               | 0.0096±0.0004d                       | 0.0104±0.0010d                           | 0.0064±0.0003d                |
| No. 15 | 0.3167±0.0487a                       | 0.0440±0.0050b                    | 0.0094±0.0007de               | 0.0189±0.0015c                          | 0.0200±0.0013c                              | 0.0120±0.0005d               | 0.0091±0.0006de                      | 0.0097±0.0007de                          | 0.0080±0.0006e                |



|        |                |                 |                 |                  |                  |                  |                  |                 |                 |
|--------|----------------|-----------------|-----------------|------------------|------------------|------------------|------------------|-----------------|-----------------|
| No. 17 | 0.4263±0.0359a | 0.0434±0.0056b  | 0.0096±0.0006d  | 0.0151±0.0015cd  | 0.0194±0.0013bc  | 0.0104±0.0008d   | 0.0100±0.0004d   | 0.0097±0.0005d  | 0.0063±0.0003e  |
| No. 18 | 0.3804±0.0376a | 0.0310±0.0026b  | 0.0057±0.0005d  | 0.0123±0.0010c   | 0.0159±0.0010c   | 0.0064±0.0005d   | 0.0063±0.0003d   | 0.0064±0.0004d  | 0.0047±0.0005d  |
| No. 19 | 0.2466±0.0317a | 0.0393±0.0042b  | 0.0051±0.0004d  | 0.0096±0.0014cd  | 0.0149±0.0010c   | 0.0051±0.0006d   | 0.0047±0.0004d   | 0.0060±0.0004d  | 0.0039±0.0003d  |
| No. 21 | 0.1253±0.0177a | 0.0239±0.0022b  | 0.0049±0.0004e  | 0.0114±0.0008c   | 0.0121±0.0009c   | 0.0067±0.0005de  | 0.0089±0.0006cd  | 0.0084±0.0003cd | 0.0057±0.0006de |
| No. 22 | 0.2783±0.0355a | 0.0271±0.0019b  | 0.0057±0.0005c  | 0.0173±0.0035bc  | 0.0133±0.0018c   | 0.0077±0.0009c   | 0.0077±0.0006c   | 0.0063±0.0005c  | 0.0047±0.0004c  |
| No. 23 | 0.2406±0.0251a | 0.0319±0.0049b  | 0.0053±0.0004e  | 0.0096±0.0007cd  | 0.0123±0.0008bc  | 0.0069±0.0004de  | 0.0057±0.0004e   | 0.0061±0.0006e  | 0.0049±0.0004e  |
| No. 24 | 0.3299±0.0398a | 0.0263±0.0026b  | 0.0051±0.0003d  | 0.0121±0.0007c   | 0.0127±0.0010c   | 0.0064±0.0005d   | 0.0059±0.0003d   | 0.0060±0.0000d  | 0.0040±0.0000d  |
| No. 26 | 0.3624±0.0201a | 0.0813±0.0128b  | 0.0074±0.0004de | 0.0163±0.0016c   | 0.0194±0.0008c   | 0.0086±0.0005de  | 0.0091±0.0006d   | 0.0089±0.0006de | 0.0063±0.0003e  |
| No. 27 | 0.5343±0.0740a | 0.0386±0.0057b  | 0.0070±0.0006c  | 0.0179±0.0030bc  | 0.0163±0.0023bc  | 0.0089±0.0011c   | 0.0090±0.0004c   | 0.0079±0.0010c  | 0.0056±0.0006c  |
| No. 30 | 0.1741±0.0202a | 0.0221±0.0020b  | 0.0064±0.0003de | 0.0124±0.0014cd  | 0.0127±0.0005c   | 0.0066±0.0006de  | 0.0064±0.0003de  | 0.0060±0.0002e  | 0.0051±0.0004e  |
| No. 31 | 0.2180±0.0240a | 0.0239±0.0011b  | 0.0049±0.0003f  | 0.0109±0.0009cd  | 0.0119±0.0009c   | 0.0066±0.0004ef  | 0.0071±0.0004de  | 0.0066±0.0004e  | 0.0047±0.0004f  |
| No. 34 | 0.3877±0.0589a | 0.0716±0.0080b  | 0.0106±0.0010ef | 0.0169±0.0013cd  | 0.0231±0.0018c   | 0.0113±0.0012def | 0.0090±0.0007ef  | 0.0117±0.0008de | 0.0080±0.0002f  |
| No. 35 | 0.3526±0.0758a | 0.0371±0.0060ab | 0.0064±0.0009cd | 0.0173±0.0025abc | 0.0150±0.0015abc | 0.0086±0.0012cd  | 0.0107±0.0017bcd | 0.0090±0.0009cd | 0.0054±0.0006d  |
| No. 37 | 0.3256±0.0537a | 0.0346±0.0034b  | 0.0073±0.0005d  | 0.0140±0.0009c   | 0.0141±0.0010c   | 0.0074±0.0004d   | 0.0079±0.0006d   | 0.0079±0.0003d  | 0.0057±0.0003d  |
| No. 38 | 0.8389±0.2573a | 0.0603±0.0161b  | 0.0054±0.0007c  | 0.0171±0.0031b   | 0.0169±0.0029b   | 0.0064±0.0006c   | 0.0056±0.0006c   | 0.0049±0.0006c  | 0.0039±0.0003c  |

|        |                |                |                 |                 |                |                 |                 |                 |                |
|--------|----------------|----------------|-----------------|-----------------|----------------|-----------------|-----------------|-----------------|----------------|
| No. 39 | 0.3390±0.0653a | 0.0390±0.0046b | 0.0063±0.0003ef | 0.0144±0.0016cd | 0.0151±0.0011c | 0.0069±0.0003e  | 0.0077±0.0003de | 0.0064±0.0003ef | 0.0051±0.0003f |
| No. 41 | 0.5916±0.0814a | 0.0546±0.0018b | 0.0073±0.0006ef | 0.0173±0.0018cd | 0.0199±0.0007c | 0.0099±0.0008de | 0.0089±0.0006e  | 0.0086±0.0005ef | 0.0060±0.0005f |

Each value is given as the mean ± standard error (n=7). Within rows, means followed by the same letter are not significantly different at P < 0.05 (Games-Howell test).



**Table 5: Pearson correlation analysis between the capacitance of different parts of avocado leaves and the LT50.**

|                            | Different parts of leaf                    |                                         |                                  |                                               |                                                   |                                 |                                            |                                                |                                  |
|----------------------------|--------------------------------------------|-----------------------------------------|----------------------------------|-----------------------------------------------|---------------------------------------------------|---------------------------------|--------------------------------------------|------------------------------------------------|----------------------------------|
|                            | The main vein<br>at the leaf stalk<br>base | The main vein<br>middle leaf<br>station | The main vein<br>at the leaf tip | The lateral vein<br>at the leaf stalk<br>base | The lateral vein<br>at the middle<br>leaf section | The lateral<br>vein at leaf tip | The mesophyll<br>in the leaf stalk<br>base | The mesophyll<br>in the middle<br>leaf section | The mesophyll<br>in the leaf tip |
| Correlation<br>coefficient | 0.356                                      | 0.434*                                  | 0.412*                           | 0.494**                                       | 0.353                                             | 0.276                           | 0.351                                      | 0.383                                          | 0.256                            |
| Sig.                       | 0.074                                      | 0.027                                   | 0.036                            | 0.010                                         | 0.077                                             | 0.172                           | 0.079                                      | 0.054                                          | 0.206                            |

\* Significant correlation at the 0.05 level (bilateral)

\*\* Significant correlation at the 0.01 level (bilateral)



**Table 6: Capacitance of different parts of leaves in two mango plants.**

|               | Capacitance (nF)                     |                                   |                               |                                         |                                             |                              |                                      |                                          |                               |
|---------------|--------------------------------------|-----------------------------------|-------------------------------|-----------------------------------------|---------------------------------------------|------------------------------|--------------------------------------|------------------------------------------|-------------------------------|
|               | The main vein at the leaf stalk base | The main vein middle leaf station | The main vein at the leaf tip | The lateral vein at the leaf stalk base | The lateral vein at the middle leaf section | The lateral vein at leaf tip | The mesophyll in the leaf stalk base | The mesophyll in the middle leaf section | The mesophyll in the leaf tip |
| Dongmang      | 1.1394±0.1243                        | 0.1890±0.0241                     | 0.0065±0.0006                 | 0.0037±0.0006                           | 0.0043±0.0005                               | 0.0033±0.0004                | 0.0023±0.0003                        | 0.0020±0.0000                            | 0.0020±0.0000                 |
| Tainong No. 1 | 2.0448±0.3304                        | 0.3764±0.0624                     | 0.0117±0.0013                 | 0.0039±0.0007                           | 0.0047±0.0009                               | 0.0037±0.0006                | 0.0025±0.0005                        | 0.0023±0.0003                            | 0.0023±0.0003                 |

Each value is given as the mean ± standard error (n=10).

**Table 7: Variance analysis of counterpart of leaves in two mango plants.**

|      | The main vein<br>at the leaf stalk<br>base | The main vein<br>middle leaf<br>station | The main vein<br>at the leaf tip | The lateral vein<br>at the leaf stalk<br>base | The lateral vein<br>at the middle<br>leaf section | The lateral vein<br>at leaf tip | The mesophyll<br>in the leaf stalk<br>base | The mesophyll<br>in the middle<br>leaf section | The mesophyll<br>in the leaf tip |
|------|--------------------------------------------|-----------------------------------------|----------------------------------|-----------------------------------------------|---------------------------------------------------|---------------------------------|--------------------------------------------|------------------------------------------------|----------------------------------|
| F    | 7.207*                                     | 16.913**                                | 5.321*                           | 0.046                                         | 0.165                                             | 0.275                           | 0.200                                      | 1.000                                          | 1.000                            |
| Sig. | 0.018                                      | 0.001                                   | 0.037                            | 0.835                                         | 0.692                                             | 0.610                           | 0.670                                      | 0.374                                          | 0.374                            |

\* Significant differences at the 0.05 level.

\*\* Significant differences at the 0.01 level





Appendix 1 Corresponding number of avocado varieties.

| Number | Varieties   |
|--------|-------------|
| No. 1  | Guikengda3# |
| No. 6  | YN-01       |
| No. 7  | Liangyuan1# |
| No. 8  | Liangyuan2# |
| No. 9  | Liangyuan3# |
| No. 10 | Liangyuan4# |
| No. 11 | Fuerte      |
| No. 12 | Hass        |
| No. 13 | Bacon       |
| No. 14 | Zaohua1#    |
| No. 15 | Daling17#   |
| No. 16 | Daling4#    |
| No. 17 | Reed        |
| No. 18 | Daling6#    |
| No. 19 | Daling7#    |
| No. 21 | Daling9#    |
| No. 22 | Daling10#   |
| No. 23 | Daling11#   |
| No. 24 | HD-1        |
| No. 25 | Daling12#   |
| No. 26 | Daling13#   |

---

|        |           |
|--------|-----------|
| No. 27 | Daling14# |
| No. 28 | Daling16# |
| No. 29 | Zaohua2#  |
| No. 30 | Reyuan12# |
| No. 31 | Daling20# |
| No. 32 | Daling2#  |
| No. 33 | Pollock   |
| No. 34 | YN017     |
| No. 35 | YN001     |
| No. 37 | Zutanno   |
| No. 38 | 1781      |
| No. 39 | ST3       |
| No. 40 | lulla     |
| No. 41 | Rincon    |
| No. 42 | Herman    |
| No. 43 | ST0       |
| No. 44 | ST9       |

---





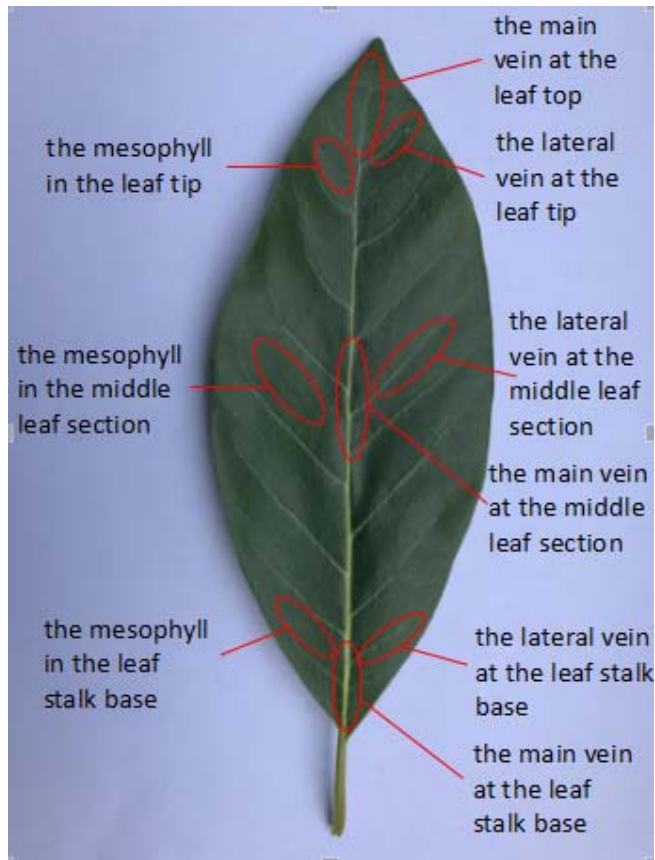

Fig. 1 Measuring sections of capacitanc in avocado leaf .

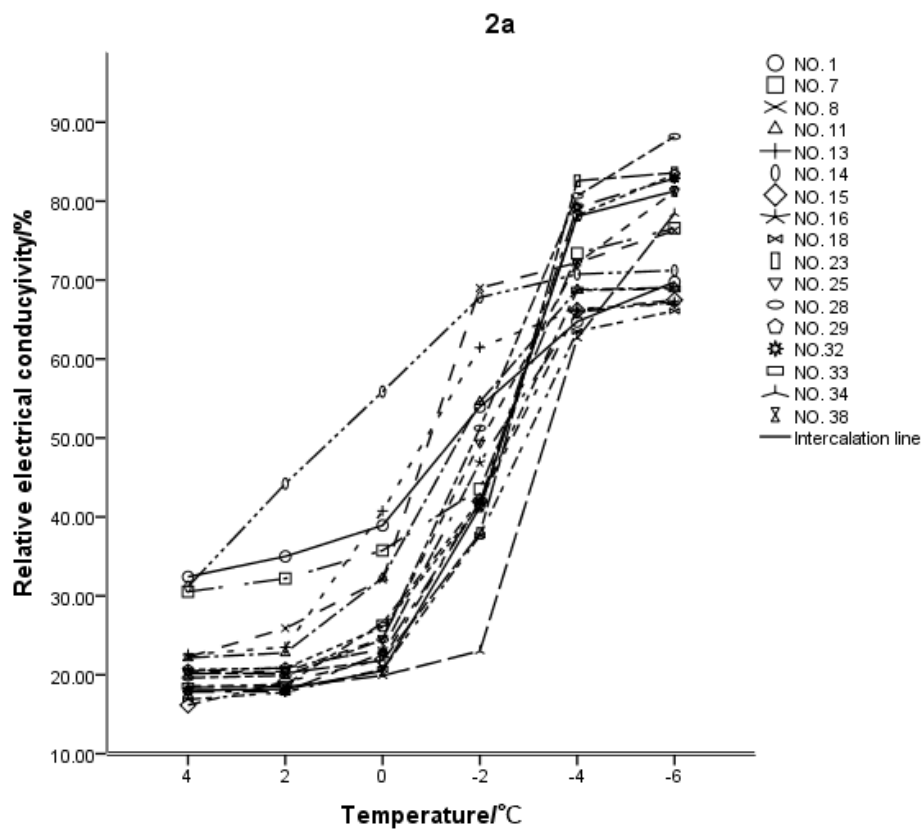

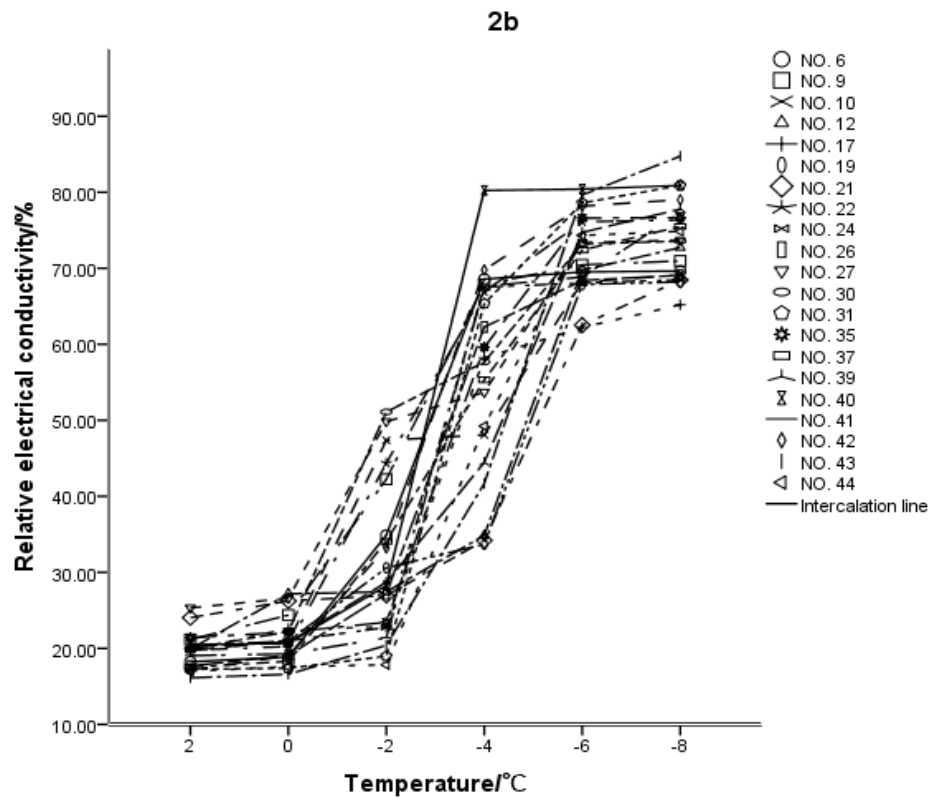

Fig. 2 Varying curves of relative electrical conductivity of avocado varieties at different temperatures.
